# Supplementary material
Source: publisher figshare collection journal article supplement (https://tandf.figshare.com/ndownloader/files/23613472)
Supplement: Supplementary file 1 [file 23613472]

| Motor impairments | **Spinal**  **cord**  **injury** |  |  |  |  |  |  |  |  |  |  |  |  | 27 |  |  | 27 |  |  |  |  |
| --- | --- | --- | --- | --- | --- | --- | --- | --- | --- | --- | --- | --- | --- | --- | --- | --- | --- | --- | --- | --- | --- |
| **Parkinsons disease** |  |  | 9,34,40, 88 |  |  |  |  |  |  |  |  |  |  | 40, 42, 88 |  | 9, 34, 40, 88 |  | 9,34,40, 51, 88 |  | 40, 88 |
| **Neuro-muscular diseases**  **kkk** |  |  |  |  |  |  |  |  |  |  |  |  | 93 |  |  |  |  |  |  | 93 |
| **Neurological cancers** |  |  |  |  |  |  | 8,50 |  |  |  |  |  | 5 |  |  |  |  |  |  | 5 |
| **Neuro-inflammatory diseases** | 2 |  |  |  |  |  |  |  |  |  | 2 | 2 |  |  |  |  |  |  |  |  |
| **Neuro-infections** | 41 |  |  |  |  |  |  |  |  |  |  |  | 41 |  |  |  |  |  | 41,99 |  |
| **Narcolepsy** |  |  |  |  |  |  |  |  |  |  |  |  |  |  |  |  |  |  |  |  |
| **Mild Cognitive impairment** |  |  |  |  |  |  |  |  |  |  |  |  |  |  |  |  |  |  |  |  |
| **Hydro-cephalus** |  |  |  |  |  |  |  |  |  |  |  |  |  |  |  |  |  |  |  | 78 |
| **Genetic disorders** | 74 | 46,71 | 60 | 46 | 60 | 87 |  | 87 |  | 47 |  |  | 87, 18 |  |  | 18, 87 |  | 18 | 71 | 46, 87 |
| **Epilepsy** |  |  |  |  |  |  |  |  |  |  |  |  |  |  |  |  |  |  | 77 |  |
| **Developmental disorders** |  | 69 |  |  |  | 69 |  |  |  |  |  |  |  |  | 10 |  | 69 |  | 67, 83 | 4 |
| **Demyelinating diseases** | 33, 81 |  |  |  |  | 81 |  |  |  |  | 81 |  | 81, 23 | 33 |  | 81 |  | 81, 82 | 33, 57 | 44, 81 |
| **Degenerative dementias** |  |  |  |  |  |  |  |  |  |  |  |  |  |  |  |  |  |  |  |  |
| **Cervical dystonia** |  |  |  |  |  | 22,48,55 |  |  |  |  |  |  |  |  |  |  |  |  |  |  |
| **Cerebro-vascular diseases** | 6 | 7 |  | 7 |  |  | 7 |  |  |  |  |  | 75 |  |  |  |  |  | 75 |  |
| **Brain**  **injury** |  | 11, 89,  92 |  |  |  | 15 |  |  | 61 |  |  |  | 92 |  |  | 15 |  |  |  | 11, 89 |
| **Birth**  **defect** |  |  |  |  |  |  |  |  |  |  |  |  |  |  |  |  |  |  | 19 |  |
|  | **Ataxia** | **Balance** | **Bradykinesia** | **Coordination** | **Chorea** | **Dystonia** | **Fine motor skills** | **Gross motor skills** | **Hypokinesia** | **Motor timing** | **Myoclonus** | **Opsoclonus** | **Paralysis/**  **Paresis** | **Postural instability** | **Selective voluntary motor control (prox. To distal increase.)** | **Hypertonia (Spasticity/**  **Rigidity)** | **Synkinesia** | **Tremor** | **Unspecific motor** | **Walking/Gait** |

*Table 1. The 18 neurological disease groups and the articles of the reported 20 motor impairments.*

| Cognitive/behavioural impairments | **Spinal**  **cord**  **injury** |  |  |  |  |  |  |  |  |  |  |  |  |  |  |  |
| --- | --- | --- | --- | --- | --- | --- | --- | --- | --- | --- | --- | --- | --- | --- | --- | --- |
| **Parkinsons disease** |  |  |  | 34 | 1,16,30,  34,51,56, 65,73,88 | 1 |  | 9,30,34,  56,73,88 |  |  | 16,34,39,  51,56,65,  73,88, | 30 |  |  | 56,30,34,  73,88 |
| **Neuro-muscular diseases** |  |  |  | 24 |  |  |  | 24,100 |  |  | 24,70 |  |  |  |  |
| **Neurological cancers** |  |  |  |  | 36,38,50, 84 |  |  | 50 |  |  | 50,84 | 36, 38 |  | 5 |  |
| **Neuro-inflammatory diseases** |  |  |  |  |  |  |  |  |  |  |  |  | 2 | 2 |  |
| **Neuro-infections** |  |  |  |  |  |  |  | 99 |  |  | 41 |  | 41 | 99 |  |
| **Narcolepsy** |  |  |  |  |  |  |  |  |  |  |  |  |  |  |  |
| **Mild Cognitive impairment** |  |  | 21 |  | 12 |  | 12 | 12 |  |  | 29 |  |  |  | 12 |
| **Hydro-cephalus** |  |  |  |  | 78 |  |  | 78 |  |  | 78 |  |  |  | 78 |
| **Genetic disorders** |  |  |  |  | 76 |  |  | 32,76 |  |  | 31,32,46, 54,76 | 32 | 74 |  | 32,31 |
| **Epilepsy** |  |  |  |  | 53,77 |  |  |  |  |  | 17,53,77 |  |  |  |  |
| **Developmental disorders** |  |  |  |  | 69,91 |  |  |  |  |  | 91 |  | 63 | 67,83 | 91 |
| **Demyelinating diseases** |  |  |  | 44 | 33 |  |  | 44 |  |  | 44 |  |  |  |  |
| **Degenerative dementias** | 13 | 95 | 21, 49 |  |  |  |  |  |  | 59 | 59,94 |  | 59 |  | 59 |
| **Cervical dystonia** |  |  |  | 22 |  |  |  |  |  |  | 55 |  |  |  |  |
| **Cerebro-vascular diseases** |  |  |  |  |  |  |  | 7,64 |  |  | 7,64 |  | 7 |  | 64 |
| **Brain**  **injury** |  | 43,92 |  | 61 | 92 |  |  | 15 | 15 | 15 | 15,92 |  | 15,92 |  | 15 |
| **Birth**  **defect** |  |  |  |  |  |  |  |  |  |  |  |  |  | 19 |  |
|  | **Aberrant motor behaviour** | **Agitated behaviour/aggression** | **Anosognosia** | **Apraxia, praxis** | **Attention/**  **concentration** | **Biological motion**  **perception** | **Cognitive fluctuations** | **Executive dysfunction** | **Fluency** | **Impulse control and**  **loss of judgement** | **Memory** | **Spatial navigation skills/orientation** | **Unspecific behavioural** | **Unspecific cognitive** | **Visuospatial** |

*Table 2. The 18 neurological disease groups and the articles of the reported 15 cognitive/behavioural impairments*.

| Sensory/sensation and uncategorized impairments | **Spinal**  **cord**  **injury** |  |  |  |  |  |  |  |  |  |  | 27 |  |  |  |  | 62 |  | 27 |
| --- | --- | --- | --- | --- | --- | --- | --- | --- | --- | --- | --- | --- | --- | --- | --- | --- | --- | --- | --- |
| **Parkinsons disease** | 72 |  |  |  |  |  |  | 16,51 |  | 25 | 51 | 30,34,40 | 16,51 | 1,16,51 |  | 1,16,36,39,40,51,65 |  | 1,16,39  51,65,96 |
| **Neuro-muscular diseases** |  |  |  |  |  |  |  |  |  |  |  | 58 | 93 |  |  | 85 | 93 |  |
| **Neurological cancers** |  |  |  |  |  |  |  | 5,84 |  |  | 84 | 5,36,38  50,84 |  |  | 84 | 84 |  | 5 |
| **Neuro-inflammatory diseases** |  |  |  |  |  |  |  |  |  |  |  | 2 |  | 2 |  | 2 |  |  |
| **Neuro-infections** |  | 41 |  |  |  |  |  | 41 |  |  |  | 41 |  |  | 41 |  |  |  |
| **Narcolepsy** |  |  |  |  |  |  |  |  |  |  |  |  |  |  |  | 80 |  |  |
| **Mild Cognitive impairment** |  |  |  |  |  |  |  |  |  |  |  |  |  |  |  |  | 12 |  |
| **Hydro-cephalus** |  |  |  |  |  |  |  |  |  |  |  |  |  |  |  |  |  |  |
| **Genetic disorders** |  | 86 |  |  |  |  |  | 18 |  |  |  | 18,60,71,74,87 | 18,60, 74 |  | 18, 101 |  |  |  |
| **Epilepsy** |  |  |  |  |  |  |  |  |  |  |  |  |  |  |  | 53 |  |  |
| **Developmental disorders** |  | 4,63,  67,68,83 |  |  |  | 3 | 28 | 4,63,67,  68,69,83 |  |  |  | 14,26,52,63,  68,69,91 | 14,45 | 14,37,45 | 4,20,63,67,68,69 |  |  | 90 |
| **Demyelinating diseases** |  |  | 23,81 | 23,33,81 |  |  | 81 | 33,81 | 57,82 |  | 23,57,81 | 23,33,44,81,98 | 23,81 | 23 | 33,44,81 | 62 |  | 23,33,44, 57,81 |
| **Degenerative dementias** |  |  |  |  |  |  |  |  |  |  |  | 59 |  |  |  |  | 35 |  |
| **Cervical dystonia** |  |  |  |  |  |  |  |  |  |  |  |  |  |  |  | 48 |  |  |
| **Cerebro-vascular diseases** |  |  | 6 | 6 | 97 | 75 |  | 7,6,66 |  |  |  | 6 | 6 |  | 64 | 79 |  |  |
| **Brain**  **injury** |  | 92 |  |  |  |  |  | 92 | 92 |  |  | 92 |  |  | 92 | 92 |  | 92 |
| **Birth**  **defect** |  |  |  |  |  |  |  |  |  |  |  |  |  |  |  |  |  |  |
|  | **biological motion perception** | **Hearing** | **Objective sensory perception.** | **Paresthesia** | **Rhythm perception** | **Somatosensory** | **Tactile registration and perception.** | **Visual** | **Unspecific sensory** | **Abnormal ventilatory control** | **Bowel** | **Communication/**  **Motor speech/**  **dysarthric/ aphasia/ dysphasia** | **Dysphagia/swallowing/ chewing/oral phase** | **Excesses saliva /drooling** | **Seizures/Epilepsies** | **Sleep** | **Stereotypies** | **Urological** |

*Table 3. The 18 neurological disease groups and the articles of the reported 9 sensory/sensation impairments and 9 uncategorized impairments.*

**References**

1. Barone, P., et al., *The PRIAMO study: A multicenter assessment of nonmotor symptoms and their impact on quality of life in Parkinson's disease.* Mov Disord, 2009. **24**(11): p. 1641-9.
2. Catsman-Berrevoets, C.E., et al., *Improvement of neurological status and quality of life in children with opsoclonus myoclonus syndrome at long-term follow-up.* Pediatr Blood Cancer, 2009. **53**(6): p. 1048-53.
3. Goble, D.J., E.A. Hurvitz, and S.H. Brown, *Deficits in the ability to use proprioceptive feedback in children with hemiplegic cerebral palsy.* Int J Rehabil Res, 2009. **32**(3): p. 267-9
4. Himmelmann, K., et al., *Dyskinetic cerebral palsy in Europe: trends in prevalence and severity.* Arch Dis Child, 2009. **94**(12): p. 921-6.
5. Hottinger, A.F., et al., *Neurological outcome of long-term glioblastoma survivors.* J Neurooncol, 2009. **95**(3): p. 301-305.
6. Kim, J.S. and Y.S. Han, *Medial medullary infarction: clinical, imaging, and outcome study in 86 consecutive patients.* Stroke, 2009. **40**(10): p. 3221-5.
7. Roze, E., et al., *Functional outcome at school age of preterm infants with periventricular hemorrhagic infarction.* Pediatrics, 2009. **123**(6): p. 1493-500.
8. Rueckriegel, S.M., et al., *Loss of fine motor function correlates with ataxia and decline of cognition in cerebellar tumor survivors.* Pediatr Blood Cancer, 2009. **53**(3): p. 424-31.
9. Campos-Sousa, I.S., et al., *Executive dysfunction and motor symptoms in Parkinson's disease.* Arq Neuropsiquiatr, 2010. **68**(2): p. 246-51.
10. Fowler, E.G., L.A. Staudt, and M.B. Greenberg, *Lower-extremity selective voluntary motor control in patients with spastic cerebral palsy: increased distal motor impairment.* Dev Med Child Neurol, 2010. **52**(3): p. 264-9.
11. Katz-Leurer, M., et al., *Recreational physical activities among children with a history of severe traumatic brain injury.* Brain Inj, 2010. **24**(13-14): p. 1561-7.
12. Molano, J., et al., *Mild cognitive impairment associated with limbic and neocortical Lewy body disease: a clinicopathological study.* Brain, 2010. **133**(Pt 2): p. 540-56.
13. Nagata, T., et al., *Relationship of frontal lobe dysfunction and aberrant motor behaviors in patients with Alzheimer's disease.* International Psychogeriatrics, 2010. **22**(3): p. 463-469.
14. Parkes, J., et al., *Oromotor dysfunction and communication impairments in children with cerebral palsy: a register study.* Dev Med Child Neurol, 2010. **52**(12): p. 1113-9.
15. Peskine, A., et al., *Neurological sequelae after cerebral anoxia.* Brain Inj, 2010. **24**(5): p. 755-61.
16. Rodriguez-Violante, M., et al., *Prevalence of non-motor dysfunction among Parkinson's disease patients from a tertiary referral center in Mexico City.* Clin Neurol Neurosurg, 2010. **112**(10): p. 883-5.
17. Tudesco Ide, S., et al., *Assessment of working memory in patients with mesial temporal lobe epilepsy associated with unilateral hippocampal sclerosis.* Epilepsy Behav, 2010. **18**(3): p. 223-8.
18. Tylki-Szymanska, A., et al., *Neuronopathic Gaucher disease: demographic and clinical features of 131 patients enrolled in the International Collaborative Gaucher Group Neurological Outcomes Subregistry.* J Inherit Metab Dis, 2010. **33**(4): p. 339-46.
19. Vinck, A., et al., *Motor profile and cognitive functioning in children with spina bifida.* Eur J Paediatr Neurol, 2010. **14**(1): p. 86-92.
20. Wanigasinghe, J., et al., *Epilepsy in hemiplegic cerebral palsy due to perinatal arterial ischaemic stroke.* Dev Med Child Neurol, 2010. **52**(11): p. 1021-7.
21. Galeone, F., et al., *Anosognosia for memory deficit in amnestic mild cognitive impairment and Alzheimer's disease.* Int J Geriatr Psychiatry, 2011. **26**(7): p. 695-701.
22. Hoffland, B.S., et al., *Patients with primary cervical dystonia have evidence of discrete deficits in praxis.* J Neurol Neurosurg Psychiatry, 2011. **82**(6): p. 615-9.
23. Karkare, K., et al., *Temporal profile of pain and other sensory manifestations in Guillain-Barre' syndrome during ten days of hospitalization.* Neurology India, 2011. **59**(5): p. 712-716.
24. Mento, G., V. Tarantino, and P.S. Bisiacchi, *The neuropsychological profile of infantile Duchenne muscular dystrophy.* Clin Neuropsychol, 2011. **25**(8): p. 1359-77.
25. Seccombe, L.M., et al., *Abnormal ventilatory control in Parkinson's disease--further evidence for non-motor dysfunction.* Respir Physiol Neurobiol, 2011. **179**(2-3): p. 300-4.
26. Sigurdardottir, S. and T. Vik, *Speech, expressive language, and verbal cognition of preschool children with cerebral palsy in Iceland.* Dev Med Child Neurol, 2011. **53**(1): p. 74-80.
27. Teo, S.H., et al., *Health of people with spinal cord injury in Singapore: implications for rehabilitation planning and implementation.* Disability and rehabilitation, 2011. **33**(15-16): p. 1460-1474.
28. Auld, M.L., et al., *Tactile function in children with unilateral cerebral palsy compared to typically developing children.* Disabil Rehabil, 2012. **34**(17): p. 1488-94.
29. Barbeau, E.J., et al., *Extent and neural basis of semantic memory impairment in mild cognitive impairment.* J Alzheimers Dis, 2012. **28**(4): p. 823-37.
30. Ben Sassi, S., et al., *Cognitive dysfunction in Tunisian LRRK2 associated Parkinson's disease.* Parkinsonism Relat Disord, 2012. **18**(3): p. 243-6.
31. Dumas, E.M., et al., *Visual Working Memory Impairment in Premanifest Gene-Carriers and Early Huntington's Disease.* J Huntingtons Dis, 2012. **1**(1): p. 97-106.
32. Majerova, V., et al., *Disturbance of real space navigation in moderately advanced but not in early Huntington's disease.* J Neurol Sci, 2012. **312**(1-2): p. 86-91.
33. Pena, J.A., et al., *Pediatric multiple sclerosis in Venezuela.* Arq Neuropsiquiatr, 2012. **70**(4): p. 267-70.
34. Poletti, M., et al., *Mild cognitive impairment and cognitive-motor relationships in newly diagnosed drug-naive patients with Parkinson's disease.* J Neurol Neurosurg Psychiatry, 2012. **83**(6): p. 601-6.
35. Prioni, S., et al., *Stereotypic behaviors in degenerative dementias.* J Neurol, 2012. **259**(11): p. 2452-9.
36. Ratti, P.L., et al., *REM and NREM sleep enactment behaviors in Parkinson's disease, Parkinson's disease dementia, and dementia with Lewy bodies.* Sleep Med, 2012. **13**(7): p. 926-32.
37. Reid, S.M., et al., *Prevalence and predictors of drooling in 7- to 14-year-old children with cerebral palsy: a population study.* Dev Med Child Neurol, 2012. **54**(11): p. 1032-6.
38. Yavas, C., et al., *Health-related quality of life in high-grade glioma patients: a prospective single-center study.* Support Care Cancer, 2012. **20**(10): p. 2315-25.
39. Breen, K.C. and G. Drutyte, *Non-motor symptoms of Parkinson's disease: the patient's perspective.* J Neural Transm (Vienna), 2013. **120**(4): p. 531-5.
40. Bugalho, P. and M. Viana-Baptista, *REM sleep behavior disorder and motor dysfunction in Parkinson's disease--a longitudinal study.* Parkinsonism Relat Disord, 2013. **19**(12): p. 1084-7.
41. Oluwayemi, I.O., et al., *Neurological sequelae in survivors of cerebral malaria.* Pan Afr Med J, 2013. **15**: p. 88.
42. Williams-Gray, C.H., et al., *The CamPaIGN study of Parkinson's disease: 10-year outlook in an incident population-based cohort.* J Neurol Neurosurg Psychiatry, 2013. **84**(11): p. 1258-64.
43. Wolffbrandt, M.M., et al., *Occurrence and severity of agitated behavior after severe traumatic brain injury.* Rehabil Nurs, 2013. **38**(3): p. 133-41.
44. Assouad, R., et al., *Clinical and MRI characterization of MS patients with a pure and severe cognitive onset.* Clin Neurol Neurosurg, 2014. **126**: p. 55-63.
45. Benfer, K.A., et al., *Oropharyngeal dysphagia in preschool children with cerebral palsy: oral phase impairments.* Res Dev Disabil, 2014. **35**(12): p. 3469-81.
46. Champion, J.A., et al., *Relationship between cognitive dysfunction, gait, and motor impairment in children and adolescents with neurofibromatosis type 1.* Dev Med Child Neurol, 2014. **56**(5): p. 468-74.
47. Debrabant, J., et al., *Deficient motor timing in children with neurofibromatosis type 1.* Res Dev Disabil, 2014. **35**(11): p. 3131-8.
48. Eichenseer, S.R., G.T. Stebbins, and C.L. Comella, *Beyond a motor disorder: a prospective evaluation of sleep quality in cervical dystonia.* Parkinsonism Relat Disord, 2014. **20**(4): p. 405-8.
49. Gambina, G., et al., *Awareness of cognitive deficits and clinical competence in mild to moderate Alzheimer's disease: their relevance in clinical practice.* Neurol Sci, 2014. **35**(3): p. 385-90.
50. Gerstenecker, A., et al., *Cognition in patients with newly diagnosed brain metastasis: Profiles and implications.* Journal of Neuro-Oncology, 2014. **120**(1): p. 179-185.
51. Giorelli, M., et al., *Do non-motor symptoms in Parkinson's disease differ from essential tremor before initial diagnosis? A clinical and scintigraphic study.* Parkinsonism Relat Disord, 2014. **20**(1): p. 17-21.
52. Mei, C., et al., *Motor speech impairment, activity, and participation in children with cerebral palsy.* Int J Speech Lang Pathol, 2014. **16**(4): p. 427-35.
53. Miller, W.R., T. Bakas, and J.M. Buelow, *Problems, needs, and useful strategies in older adults self-managing epilepsy: Implications for patient education and future intervention programs.* Epilepsy and Behavior, 2014. **31**: p. 25-30.
54. Nicoll, D.R., et al., *"Forgetting to remember" in Huntington's disease: a study of laboratory, semi-naturalistic, and self* *perceptions of prospective memory.* J Int Neuropsychol Soc, 2014. **20**(2): p. 192-9.
55. Romano, R., et al., *Impaired cognitive functions in adult-onset primary cranial cervical dystonia.* Parkinsonism Relat Disord, 2014. **20**(2): p. 162-5.
56. Wang, Q., et al., *Assessment of cognitive impairment in patients with Parkinson's disease: prevalence and risk factors.* Clin Interv Aging, 2014. **9**: p. 275-81.
57. Wang, Y., et al., *Comparison of clinical characteristics between neuromyelitis optica spectrum disorders with and without spinal cord atrophy.* BMC Neurol, 2014. **14**: p. 246.
58. Ash, S., et al., *Deficits in sentence expression in amyotrophic lateral sclerosis.* Amyotroph Lateral Scler Frontotemporal Degener, 2015. **16**(1-2): p. 31-9.
59. Barnes, J., et al., *Alzheimer's disease first symptoms are age dependent: Evidence from the NACC dataset.* Alzheimers Dement, 2015. **11**(11): p. 1349-57.
60. de Tommaso, M., et al., *Dysphagia in Huntington's Disease: Correlation with Clinical Features.* Eur Neurol, 2015. **74**(1-2): p. 49-53.
61. Falchook, A.D., et al., *Cognitive-motor dysfunction after severe traumatic brain injury: A cerebral interhemispheric disconnection syndrome.* J Clin Exp Neuropsychol, 2015. **37**(10): p. 1062-73.
62. Fogelberg, D.J., et al., *Comparison of self-report sleep measures for individuals with multiple sclerosis and spinal cord injury.* Arch Phys Med Rehabil, 2015. **96**(3): p. 478-83.
63. Kakooza-Mwesige, A., et al., *Cerebral palsy in children in Kampala, Uganda: clinical subtypes, motor function and co-morbidities.* BMC Res Notes, 2015. **8**: p. 166.
64. Kumral, E., et al., *Isolated hippocampal infarcts: Vascular and neuropsychological findings.* J Neurol Sci, 2015. **356**(1-2): p. 83-9.
65. Lee, H.M., et al., *Clinical phenotype of drug-naive Parkinson's disease based on nonmotor symptoms.* Arch Gerontol Geriatr, 2015. **61**(3): p. 517-22.
66. Sayoko, N., S. Megumi, and K. Kazumi, *Prevalence and association of visual functional deficits with lesion characteristics and functional neurological deficits in patients with stroke.* NeuroRehabilitation, 2015. **37**(2): p. 203-211.
67. Bearden, D.R., et al., *Pediatric Cerebral Palsy in Botswana: Etiology, Outcomes, and Comorbidities.* Pediatr Neurol, 2016. **59**: p. 23-9.
68. Delacy, M.J. and S.M. Reid, *Profile of associated impairments at age 5 years in Australia by cerebral palsy subtype and Gross Motor Function Classification System level for birth years 1996 to 2005.* Dev Med Child Neurol, 2016. **58 Suppl 2**: p. 50-6.
69. Farmer, M., B. Echenne, and M. Bentourkia, *Study of clinical characteristics in young subjects with Developmental coordination disorder.* Brain Dev, 2016. **38**(6): p. 538-47.
70. Hervieu-Begue, M., et al., *Semantic memory assessment in 15 patients with amyotrophic lateral sclerosis.* Rev Neurol (Paris), 2016. **172**(4-5): p. 307-12.
71. Iannuzzi, S., et al., *Motor impairment in children with Neurofibromatosis type 1: Effect of the comorbidity with language disorders.* Brain Dev, 2016. **38**(2): p. 181-7.
72. Jaywant, A., et al., *Impaired perception of biological motion in Parkinson's disease.* Neuropsychology, 2016. **30**(6): p. 720-30.
73. Kalbe, E., et al., *Subtypes of mild cognitive impairment in patients with Parkinson's disease: evidence from the LANDSCAPE study.* J Neurol Neurosurg Psychiatry, 2016. **87**(10): p. 1099-105.
74. Martinuzzi, A., et al., *Clinical and Paraclinical Indicators of Motor System Impairment in Hereditary Spastic Paraplegia: A Pilot Study.* PLoS One, 2016. **11**(4): p. e0153283.
75. Meyer, S., et al., *Associations Between Sensorimotor Impairments in the Upper Limb at 1 Week and 6 Months After Stroke.* J Neurol Phys Ther, 2016. **40**(3): p. 186-95.
76. Moriarty, A., et al., *A longitudinal investigation into cognition and disease progression in spinocerebellar ataxia types 1, 2, 3, 6, and 7.* Orphanet J Rare Dis, 2016. **11**(1): p. 82.
77. Patrikelis, P., et al., *Preoperative neuropsychological presentation of patients with refractory frontal lobe epilepsy.* Acta Neurochir (Wien), 2016. **158**(6): p. 1139-50.
78. Picascia, M., et al., *Spectrum of cognitive disorders in idiopathic normal pressure hydrocephalus.* Funct Neurol, 2016. **31**(3): p. 143-7.
79. Suh, M., S. Choi-Kwon, and J.S. Kim, *Sleep Disturbances at 3 Months after Cerebral Infarction.* Eur Neurol, 2016. **75**(1-2): p. 75-81.
80. Antelmi, E., et al., *The spectrum of REM sleep-related episodes in children with type 1 narcolepsy.* Brain, 2017. **140**(6): p. 1669-1679.
81. Ben Achour, N., et al., *Pediatric Multiple Sclerosis in Tunisia: A Retrospective Study over 11 Years.* Biomed Res Int, 2017. **2017**: p. 4354826.
82. Cao, Y., et al., *Postural tremor and chronic inflammatory demyelinating polyneuropathy.* Muscle Nerve, 2017. **55**(3): p.338-343.
83. He, P., et al., *Children with motor impairment related to cerebral palsy: Prevalence, severity and concurrent impairments in China.*J Paediatr Child Health, 2017. **53**(5): p. 480-484.
84. Kim, S.R., et al., *Differences in Type Composition of Symptom Clusters as Predictors of Quality of Life in Patients with Meningioma and Glioma.* World Neurosurg, 2017. **98**: p. 50-59.
85. Pera, M.C., et al., *Sleep disorders in spinal muscular atrophy.* Sleep Med, 2017. **30**: p. 160-163.
86. Profant, O., et al., *Auditory dysfunction in patients with Huntington's disease.* Clin Neurophysiol, 2017. **128**(10): p. 1946-1953.
87. Rice, G.I., et al., *Genetic, Phenotypic, and Interferon Biomarker Status in ADAR1-Related Neurological Disease.* Neuropediatrics, 2017. **48**(3): p. 166-184.
88. Siciliano, M., et al., *Cognitive impairment is associated with Hoehn and Yahr stages in early, de novo Parkinson disease patients.* Parkinsonism Relat Disord, 2017. **41**: p. 86-91.
89. Stephens, J., et al., *Subtle Motor Findings During Recovery from Pediatric Traumatic Brain Injury: A Preliminary Report.* J Mot Behav, 2017. **49**(1): p. 20-26.
90. Yildiz, N., et al., *Cross-sectional study of urinary problems in adults with cerebral palsy: awareness and impact on the quality of life.* Neurological Sciences, 2017. **38**(7): p. 1193-1203.
91. Ballester-Plane, J., et al., *Cognitive functioning in dyskinetic cerebral palsy: Its relation to motor function, communication and epilepsy.* Eur J Paediatr Neurol, 2018. **22**(1): p. 102-112.
92. Bell, C., et al., *Symptomatology following traumatic brain injury in a multidisciplinary clinic: experiences from a tertiary centre.* British Journal of Neurosurgery, 2018. **32**(5): p. 495-500.
93. Cortes-Vicente, E., et al., *Distinct Clinical Features and Outcomes in Motor Neuron Disease Associated with Behavioural Variant Frontotemporal Dementia.* Dement Geriatr Cogn Disord, 2018. **45**(3-4): p. 220-231.
94. El Haj, M., et al., *Negative Prospective Memory in Alzheimer's Disease: "Do Not Perform That Action".* J Alzheimers Dis, 2018. **61**(2): p. 663-672.
95. Liljegren, M., M. Landqvist Waldo, and E. Englund, *Physical aggression among patients with dementia, neuropathologically confirmed post-mortem.* Int J Geriatr Psychiatry, 2018. **33**(2): p. e242-e248.
96. Lin, F.Y., et al., *Increased risk of overactive bladder in patients with idiopathic Parkinson's disease: Insight from a nationwide population-based cohort study.* PLoS One, 2018. **13**(3): p. e0193783.
97. Patterson, K.K., et al., *Rhythm Perception and Production Abilities and Their Relationship to Gait After Stroke.* Arch Phys Med Rehabil, 2018. **99**(5): p. 945-951.
98. Rusz, J., et al., *Characteristics of motor speech phenotypes in multiple sclerosis.* Mult Scler Relat Disord, 2018. **19**: p. 62-69.
99. *Champs, A.P.S., et al., Cognitive impairment in HTLV-1-associated myelopathy,* proviral load and inflammatory markers. Int J Infect Dis, 2019. **84**: p. 121-126.
100. de Alcantara, C., et al., Amyotrophic lateral sclerosis type 8 is not a pure motor disease: evidence from a neuropsychological and behavioural study. J Neurol, 2019. **266**(8): p. 1980-1987.
101. *Kokkinou, E., et al., Development of a multidisciplinary clinic of neurofibromatosis type 1 and other neurocutaneous disorders in Greece. A 3-year experience. Postgrad Med, 2019.* ***131****(7): p. 445-452.*
